# Supplementary material for: Core-crosslinked diblock terpolymer micelles – taking a closer look on crosslinking efficiency
Source: Royal Society of Chemistry journal article supplement (doi:10.1039/c8py00126j), 2018-01-01
Supplement: c8py00126j1.pdf [file c8py00126j1.pdf]

## Supporting Information

### Core-crosslinked diblock terpolymer micelles – taking a closer look on crosslinking efficiency

Johanna K. Elter<sup>a,b</sup>, Gabriele Sentis<sup>a</sup>, Peter Bellstedt<sup>a</sup>, Philip Biehl<sup>a,b</sup>, Michael Gottschaldt<sup>a,b</sup>, Felix H. Schacher<sup>a,b\*</sup>

<sup>a</sup> Institute of Organic Chemistry and Macromolecular Chemistry, Friedrich Schiller University Jena,  
Lessingstraße 8, D-07743 Jena, Germany

<sup>b</sup> Jena Center for Soft Matter (JCSM), Friedrich Schiller University Jena, Philosophenweg 7, D-07743  
Jena, Germany

\*felix.schacher@uni-jena.de

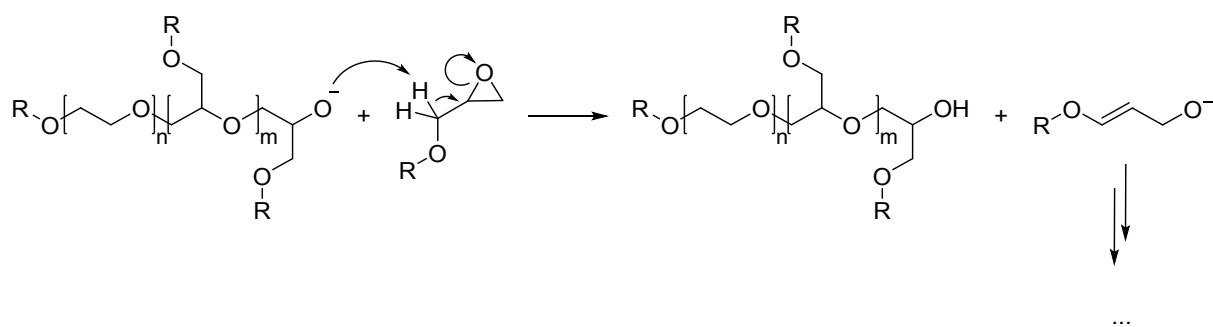

**Scheme S1** Common side reaction in poly(glycidyl ether) synthesis, as reported by Hans et al.<sup>1</sup> Proton abstraction next to the oxirane ring by an oxoanion causes transfer of the negative charge from the growing diblock terpolymer to a monomer which performs rearrangement to an unsaturated species starting new polymer chains.

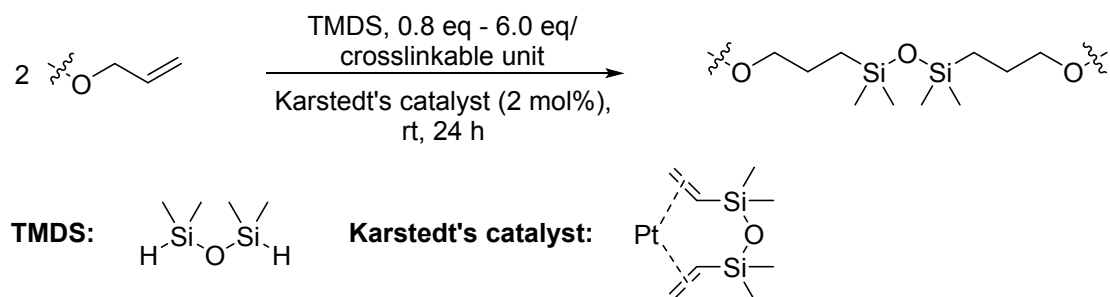

**Scheme S2** Crosslinking *via* hydrosilylation of allyl units, catalyzed by the Pt(0) species Karstedt's catalyst. The amount of TMDS was varied between 0.8 equivalents and 6.0 equivalents of Si-H/allyl unit.

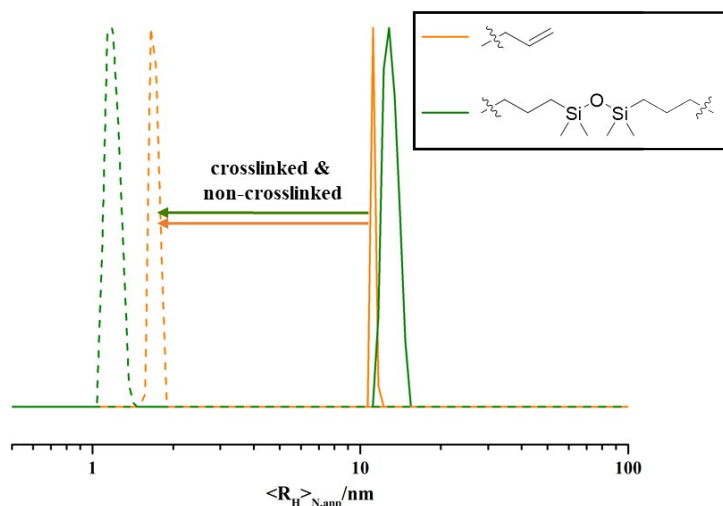

**Figure S1** Number weighted DLS CONTIN plots of non-crosslinked PEO<sub>0.18</sub>-*b*-P(AGE-*co*-*t*BGE)<sub>0.82</sub>-based micelles and micelles crosslinked with 0.8 eq TMDS. The dashed lines show measurements in water/THF, indicating disassembly of the micelles in both crosslinked and non-crosslinked samples upon addition of the non-selective solvent.

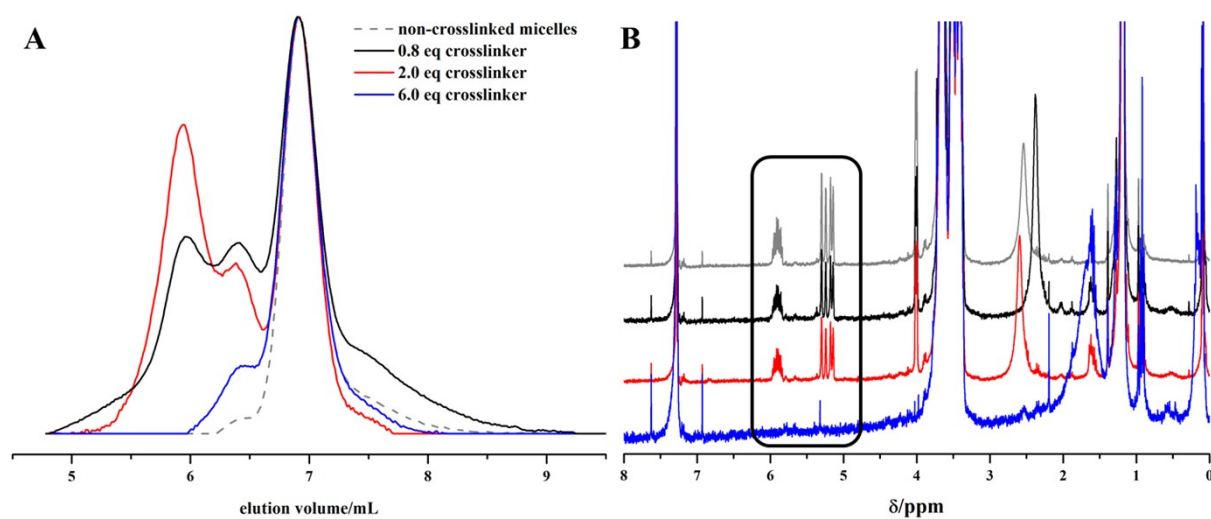

**Figure S2** A: SEC traces of PEO<sub>0.18</sub>-*b*-P(AGE-*co*-*t*BGE)<sub>0.82</sub>-based micelles, crosslinked with different amounts of TMDS. For this method, only the formation of di- and trimers is observable. B: Corresponding <sup>1</sup>H NMR spectra. It is visible that with increasing amount of TMDS used in crosslinking reactions, the amount of unreacted allyl units is decreasing (highlighted signals).

## References

1. Hans, M.; Keul, H.; Moeller, M., *Polymer* **2009**, 50 (5), 1103-1108.
